**Gautam Basu Thakur** is associate professor of English and director of the critical theory minor at Boise State University, where he teaches theoretical psychoanalysis, postcoloniality and globalization studies, and literature of the British Empire. His books include *Postcolonial Theory and Avatar* (2015), *Lacan and the Nonhuman* (coedited, 2018), *Postcolonial Lack* (2020), and *Reading Lacan's Seminar VIII* (coedited, 2020).

**Saradindu Bhattacharya** teaches at the Department of English, University of Hyderabad, India. His recent publications have been in the domains of trauma studies, young adult literature, and the pedagogy of English. He has been teaching cultural studies, Renaissance literature, and new literatures in English at the postgraduate level. Additionally, he has also taught elective courses on nation, media, and popular culture and on children's literature. He particularly enjoys teaching English poetry and reading dystopian fiction.

**Jolie Braun** is curator of modern literature and manuscripts at The Ohio State University Libraries, where she oversees the modern literature and history collections and provides special collections-based instruction. Her research interests include women publishers and booksellers, zines, and self-publishing. Her recent work has appeared or is forthcoming in *Tulsa Studies in Women's Literature*, *American Periodicals*, and *Textual Cultures: Texts, Contents, and Interpretation*.

**Craig Carey** is associate professor of English at the University of Southern Mississippi. His research and teaching focus on nineteenth-century American literature, book history, media theory, and game studies. His scholarship has appeared in journals such as *American Literature*, *American Literary History*, and *Arizona Quarterly*, among others. He is currently working on a manuscript that explores the relationship between authors, archives, and invention in the age of realism.

**Moirra A. Connelly** is associate professor of English at Pellissippi State Community College in Knoxville, TN. She has published in *Teaching English in the Two-Year College*. Her research interests include equity in collaborative writing, writing transfer, writing about writing, responding to the writing of

multilingual students, community college teaching, and applying ideas from the academy to activist spaces.

**Jathan Day** is a PhD candidate in the Joint Program in English and Education at the University of Michigan. His research explores how writing instructors' organizational and design decisions in the Canvas LMS affect the ways their students write and learn.

**Cassandra Falke** is professor of English literature at UiT The Arctic University of Norway, where she teaches an introduction to literature, literary theory, romanticism, and contemporary fiction. She is the author of *The Phenomenology of Love and Reading* (2016) and *Literature by the Working Class: English Autobiography, 1820–1848* (2013) as well as articles and book chapters on literary theory, phenomenology, romanticism, working-class writing, and liberal arts education. She has edited or coedited five collections and special issues.

**Paul Feigenbaum** is associate professor in the Department of English at Florida International University and coeditor of the *Community Literacy Journal*. His research, teaching, and engagement interests include community literacy, public rhetoric, and the intersections between rhetoric and psychology. His scholarship has appeared in journals including *College English*, *Reflections*, and *Composition Forum*. His first book, *Collaborative Imagination: Earning Activism through Literacy Education*, was published in 2015.

**Dustin Friedman** is associate professor in the Department of Literature at American University in Washington, DC. His fields of research and teaching are Victorian literature and culture, aestheticism and decadence, queer theory, the history and theory of aesthetics, and global nineteenth-century writing. He is the author of *Before Queer Theory: Victorian Aestheticism and the Self* (2019). His writings have appeared in *Studies in Walter Pater and Aestheticism* (2019), the *Journal of Modern Literature* (2015), *ELH* (2013), *Literature Compass* (2010), and *Studies in Romanticism* (2009).

**Helena Gurfinkel** is professor of English at Southern Illinois University Edwardsville, where she teaches primarily critical theory and Victorian literature and culture. She is the author of *Outlaw Fathers in Victorian and Modern British Literature: Queering Patriarchy* (2014; paperback 2017) and is currently writing a book on the Soviet television and film adaptations of the works of Oscar Wilde. She has published extensively in pedagogy, literary and film studies, gender studies, and critical theory. She is editor of *PLL: Papers on Language and Literature*.

**Sarah Hughes** is a PhD candidate in the Joint Program in English and Education at the University of Michigan, where she also teaches in the English Department Writing Program. Her research explores how women use multimodal discourse—grammatically, narratively, and visually—to navigate online gaming ecologies.

**Andrew Moos** is a PhD student in the Joint Program in English and Education at the University of Michigan. His research focuses on how writing instructors can and are using antiracist assessment and feedback practices in writing classrooms to empower students.

**Julie Sievers** is founding director of the Center for Teaching, Learning, and Scholarship at Southwestern University, where she also teaches. At the time of this research, she was teaching literature and writing courses at St. Edward's University, where she also directed the Center for Teaching Excellence. Previously, she taught English and composition on the tenure-track at Denison University and in graduate school at the University of Texas at Austin. She has published on literature, pedagogy, and faculty development in the *William and Mary Quarterly*, *Early American Literature*, the *New England Quarterly*, *To Improve the Academy: A Journal of Educational Development*, and the *Journal of Faculty Development*. She is currently studying annotation pedagogy in the context of first-year seminar courses.

**Danielle Sutton** is a PhD candidate in English studies at Illinois State University. She works at the intersections of life writing, children's literature, and memory studies and is especially interested in comics and verse memoirs of childhood. She lives in Normal, IL.

**Kathryn Van Zanen** is a PhD student in the Joint Program in English and Education at the University of Michigan. Her research centers on ethical negotiation in writing and writing instruction, particularly among raised-evangelicals writing back to their home communities on social media.

**Crystal Zanders** is a poet, educator, activist, and public speaker from Tennessee. As a Rackham Merit Fellow in the Joint PhD Program in English and Education at the University of Michigan, her research focuses on Black teachers' use of African American English in pre-integration classrooms in the South.
